# Supplementary material
Source: PubMed Central journal article supplement (PMC6436345)
Supplement: JB.00712-18-s0001.pdf [file JB.00712-18-s0001.pdf]

1 **Supplemental material**

2 **Strain construction.** Because *B. subtilis* strain NCIB3610 has low transformation ability,  
3 mutant alleles were first introduced into domestic strain 168 and then transferred to strain  
4 NCIB3610 by transformation using genomic DNA. Details for strain construction are as  
5 follows.

6 ***spx::kan* and *yjbH::kan*.** Deletion of *spx* was carried out using an overlap-extension PCR  
7 technique. A *kan* cassette was amplified from pDG780 (2) by PCR using primers pUC-R and  
8 pUC-F. The primer sequences are shown in Table S1. Upstream and downstream regions of  
9 *spx* were amplified by PCR using primer pairs *spx*-F1/*spx*-R1 and *spx*-F2/*spx*-R2,  
10 respectively. The 5' sequences of *spx*-R1 and *spx*-F2 were complementary to the sequences  
11 of pUC-R and pUC-F, respectively. To connect the three PCR fragments, all three products  
12 were mixed and used as a template for a second round of PCR using primers *spx*-F1 and *spx*-  
13 R2. The resultant PCR products were used for transformation of strain 168. Deletion of *yjbH*  
14 was carried out by the same procedure using different primer sets, *yjbH*-F4/*yjbH*-R4 and  
15 *yjbH*-F5/*yjbH*-R5. The *spx::kan* and *yjbH::kan* mutations were then transferred to NCIB3610.

16 ***P<sub>spac-hy</sub>-eps* operon and *P<sub>spac-hy</sub>-bslA*.** The 5' part of *epsA* was amplified by PCR with primers  
17 *yveK*-F4 and *yveK*-R4. PCR products were digested with *Hind*III and *Bam*HI and cloned into  
18 the same sites of pMutinT3-hy, which is a derivative of pMutin T3 (3) and contains the *spac*-  
19 *hy* promoter (4). The 5' part of *bslA* was amplified by PCR with primers *yuaB*-F8 and *yuaB*-  
20 R8. PCR products were digested with *Hind*III and *Bam*HI, and cloned into the same sites of  
21 pMutinT3-hy. Resultant plasmids were used for transformation of *B. subtilis* 168, and Em<sup>r</sup>  
22 and Lin<sup>r</sup> colonies were selected to obtain *P<sub>spac-hy</sub>-eps* operon and *P<sub>spac-hy</sub>-bslA* strains. The *erm*  
23 gene of the *P<sub>spac-hy</sub>-bslA* strain was replaced with the *tet* gene using pEm::Tc (5). *P<sub>spac-hy</sub>-eps*  
24 operon and *P<sub>spac-hy</sub>-bslA* constructs were then transferred to NCIB3610.

25 ***P<sub>xylA</sub>-tapA* operon.** The *xylA* promoter region and the 5' part of *tapA* were cloned into

26 pCA191, which is a Cm<sup>r</sup> derivative of pUC19, using In-Fusion cloning kit (Clontech Takara  
27 Bio, Kyoto, Japan). The *xylA* promoter region was amplified from plasmid pX (6) by PCR  
28 with primers *xylA-yqxM*-F1 and *xylA-yqxM*-R1. Note that the amplified *xylA* promoter region  
29 does not include the *xylR* repressor gene. The 5' region of *tapA* was amplified by PCR with  
30 primers *xylA-yqxM*-F2 and *xylA-yqxM*-R2. These primers were designed to provide an end  
31 homologous to that of the adjacent DNA fragment for In-Fusion cloning. These *xylA* and  
32 *tapA* fragments were inserted between *Hind*III and *Eco*RI sites of pCA191, in order. The  
33 resultant plasmid was used for transformation of *B. subtilis* 168, and Cm<sup>r</sup> colonies were  
34 selected to obtain the P<sub>*xylA*</sub>-*tapA* operon strain. The *cat* gene of the P<sub>*xylA*</sub>-*tapA* operon strain  
35 was replaced with the *spc* gene using pCm::Sp (5). The P<sub>*xylA*</sub>-*tapA* operon construct was then  
36 transferred to NCIB3610.

37

## 38 REFERENCES

- 39 1. Morimoto T, Loh PC, Hirai T, Asai K, Kobayashi K, Moriya S, Ogasawara N. 2002. Six  
40 GTP-binding proteins of the Era/Obg family are essential for cell growth in *Bacillus*  
41 *subtilis*. *Microbiol* 148:3539–3552.
- 42 2. Guérout-Fleury AM, Shazand K, Frandsen N, Stragier P.1995. Antibiotic-resistance  
43 cassettes for *Bacillus subtilis*. *Gene* 167:335-336.
- 44 3. Moriya, S., E. Tsujikawa, A. K. Hassan, K. Asai, T. Kodama, and N. Ogasawara. 1998.  
45 A *Bacillus subtilis* gene-encoding protein homologous to eukaryotic SMC motor protein  
46 is necessary for chromosome partition. *Mol. Microbiol* 29:179-187.
- 47 4. Quisel JD, Burkholder WF, Grossman AD. 2001. *In vivo* effects of sporulation kinases  
48 on mutant Spo0A proteins in *Bacillus subtilis*. *J Bacteriol* 183:6573-6578.
- 49 5. Steinmetz M, Richter R. 1994. Plasmids designed to alter the antibiotic resistance  
50 expressed by insertion mutations in *Bacillus subtilis*, through *in vivo* recombination.

51 Gene 142:79-83.

52 6. Kim L, Mogk A, Schumann W. 1996. A xylose-inducible *Bacillus subtilis* integration  
53 vector and its application. Gene 181:71-76.

54

55 **Table S1** Primers used in this study

| Primer               | Sequence (5' to 3')                      |
|----------------------|------------------------------------------|
| <i>spx</i> -F1       | ATTGCTCGAGGTGGAACCTG                     |
| <i>spx</i> -R1       | GTTATCCGCTCACAATTCCAGCTTGGTGATGTGTATAG   |
| <i>spx</i> -F2       | CGTCGTGACTGGGAAAACAGAGAAGCACAGCGTTTGGC   |
| <i>spx</i> -R2       | ATTTAGGATATCAGCTGCTG                     |
| <i>yjbH</i> -F4      | CGAAATGAGTCATCAAACGC                     |
| <i>yjbH</i> -R4      | GTTATCCGCTCACAATTCTTGGATGACCGTGGCAATGG   |
| <i>yjbH</i> -F5      | CGTCGTGACTGGGAAAACGTTTTGGAAGTCTCTCAGCAC  |
| <i>yjbH</i> -R5      | CTCCAGAGCCAATCGAAGCC                     |
| pUC-F                | GTTTTCCCAGTCACGACG                       |
| pUC-R                | GAATTGTGAGCGGATAAC                       |
| <i>yveK</i> -F4      | AAGAAGCTTAAGCCAGCCGCGGGAAGGCTGAA         |
| <i>yveK</i> -R4      | GGAGGATCCCCGTCTGATTCATGAACCAG            |
| <i>yuaB</i> -F8      | AAGAAGCTTAGGGGGAATTTTGTTATGAAAC          |
| <i>yuaB</i> -R8      | GGAGGATCCCAATGAAGCTGTAGACTGTG            |
| <i>xylA-yqxM</i> -F1 | GATTACGCCAAGCTTGTTTATCCACCGAACTAAGTTGGTG |
| <i>xylA-yqxM</i> -R1 | TGATATGACAATCGTTCCAATAAACTAACTTTATCTCATC |
| <i>xylA-yqxM</i> -F2 | GTTAGTTTATTGGAACGATTGTCATATCAAGTTACAGTG  |
| <i>xylA-yqxM</i> -R2 | ACGGCCAGTGAATTCTTACACGTTTGAAGTGAGAC      |

56
